1 PANINI: Pangenome Neighbor Identification for Bacterial Populations

2

3 Khalil Abudahab<sup>1,2</sup>, Joaquín M. Prada<sup>3</sup>, Zhirong Yang<sup>4</sup>, Stephen D. Bentley<sup>5</sup>,

4 Nicholas J. Croucher<sup>2</sup>, Jukka Corander<sup>\*4,5,6</sup>, David M. Aanensen<sup>\*1,2</sup>

5 \*corresponding authors

6

7 <sup>1</sup>Centre for Genomic Pathogen Surveillance, Wellcome Genome Campus,  
8 Cambridgeshire, UK

9 <sup>2</sup>Department of Infectious Disease Epidemiology, Imperial College London, W2  
10 1PJ, UK

11 <sup>3</sup>Mathematics Institute, University of Warwick, Coventry, CV4 7AL

12 <sup>4</sup>HIIT, Helsinki Institute of Information Technology, Department of Mathematics  
13 and Statistics, University of Helsinki, FI-00014 Helsinki, Finland

14 <sup>5</sup>Pathogen Genomics, Wellcome Trust Sanger Institute,

15 <sup>6</sup>Department of Biostatistics, Institute of Basic Medical Sciences, University of  
16 Oslo, N-0317 Oslo, Norway

17 mailto: [d.aanensen@imperial.ac.uk](mailto:d.aanensen@imperial.ac.uk) & [jukka.corander@medisin.uio.no](mailto:jukka.corander@medisin.uio.no)

18

19 **ABSTRACT**

20 The standard workhorse for genomic analysis of the evolution of bacterial  
21 populations is phylogenetic modelling of mutations in the core genome.

22 However, in the current era of population genomics, a notable amount of  
23 information about evolutionary and transmission processes in diverse

24 populations can be lost unless the accessory genome is also taken into

25 consideration. Here we introduce PANINI, a computationally scalable method for

26 identifying the neighbours for each isolate in a data set using unsupervised  
27 machine learning with stochastic neighbour embedding. PANINI is browser-  
28 based and integrates with the Microreact platform for rapid online visualisation  
29 and exploration of both core and accessory genome evolutionary signals  
30 together with relevant epidemiological, geographic, temporal and other  
31 metadata. Several case studies with single- and multi-clone pneumococcal  
32 populations are presented to demonstrate ability to identify biologically  
33 important signals from gene content data. PANINI is available at  
34 <http://panini.wgsa.net/> and code at <http://gitlab.com/cgps/panini>

35

## 36 **BACKGROUND**

37

38 In less than a decade, bacterial population genomics has progressed from  
39 sequencing of dozens to thousands of strains [1,2,3,4]. The biological insights  
40 enabled by population genomics are particularly important in evolutionary  
41 epidemiology, as the genome sequences provide high resolution data for the  
42 estimation of transmission and evolutionary dynamics, including horizontal  
43 transfer of virulence and resistance elements. Phylogenetic trees are the main  
44 framework utilised for visualisation and exploration of population genomic data,  
45 both in terms of the level of relatedness of strains and for mapping relevant  
46 metadata such as geographic locations and host characteristics [5]. While trees  
47 are highly useful, they are in general estimated using only core genome variation  
48 (i.e. those regions of the genome common to all members of a sample), which  
49 may represent only a fraction of the relevant differences present in genomes  
50 across the study population. Several recent studies highlight the importance of

51 considering variation in gene content when investigating the ecological and  
52 evolutionary processes leading to the observed data [6, 7].

53

54 The rapidly increasing size of population genomic datasets calls for efficient  
55 visualisation methods to explore patterns of relatedness based on core genomic  
56 polymorphisms, accessory gene content, epidemiological, geographical and other  
57 metadata. Here we introduce a framework that integrates within the web  
58 application Microreact [5], by utilising a popular unsupervised machine learning  
59 technique for big data to infer neighbors of bacterial strains from accessory gene  
60 content data and to efficiently visualize the resulting relationships. The machine  
61 learning method, called t-SNE, has already gained widespread popularity for  
62 exploring image, video and textual data [8,9], but has to our knowledge not yet  
63 been utilized for bacterial population genomics.

64

65 Since gene content may in general be rapidly altered in bacteria, it provides a  
66 high-resolution evolutionary marker of relatedness which can extend far beyond  
67 core genome mutations [7]. Different processes driving horizontal movement of  
68 DNA, such homologous recombination, conjugative transfer of plasmids and  
69 phage infections, all affect the gene content within and outside of a chromosome.  
70 By contrasting core and non-core gene content, one can investigate and draw  
71 conclusions about genome dynamics across a sample collection. Here we  
72 demonstrate the biological utility of such an approach by application to multiple  
73 population data sets.

74

75 **METHODS AND RESULTS**

76 Student t-distributed Stochastic Neighbor Embedding (t-SNE) is a machine  
77 learning algorithm which is widely used for data visualization [8]. It is suitable  
78 for embedding a set of high-dimensional data items in a 2- or 3-dimensional  
79 space. The embedding approximately preserves the pairwise similarities  
80 between the data items.

81

82 The t-SNE algorithm consists of two main steps. First, it calculates the  
83 similarities between the data items in the high-dimensional space, which is  
84 typically based on normal distribution around each data item. The similarities  
85 are then normalized to be probabilities (i.e. they sum to one). Similarities in the  
86 low-dimensional space are analogously defined and normalized except that  
87 Student t-distribution replaces the Gaussians. Second, t-SNE minimizes Kullback-  
88 Leibler divergence between the two probability matrices over the embedding  
89 coordinates. Finally, the 2-D t-SNE result can be visualized as a scatter plot  
90 where each dot indicates a data item.

91

92 t-SNE as an unsupervised method is particularly useful for exploratory data  
93 analysis. It has a wide range of applications in music analysis, cancer research,  
94 computer security research, bioinformatics, and biomedical signal processing. In  
95 many cases, t-SNE is able to identify meaningful data structures such as clusters  
96 even without feature engineering or structural assumptions, e.g. about number  
97 of clusters underlying the data. Here, we use the latest version of the t-SNE  
98 projection method, adopting the Barnes-Hut algorithm for accelerating the  
99 divergence minimization [9].

100

101 To demonstrate utility within population genomics, firstly, we explore how the  
102 method performs in a simulated setting, where the relationship between all  
103 sequences is known and then extended our analysis to published bacterial  
104 population data sets, allowing us to uncover previously unseen relationships  
105 between data and to address important biological questions.

106

## 107 **SIMULATED DATA**

108 To our knowledge, this is the first time that the t-SNE projection method has  
109 been used to explore patterns of genetic relatedness between different bacterial  
110 isolates. We have therefore validated the methodology by assessing how well it  
111 identifies neighbours and clusters for simulated genetic sequences. Firstly, we  
112 randomly generated multiple synthetic datasets of related isolates, with each  
113 defined as a sequence of present/absent genes. Each dataset is generated using  
114 the following parameters:

- 115 1. There are 20 clusters as underlying subpopulations.
- 116 2. The number of isolates belonging to a cluster is drawn from a Poisson  
117 distribution with mean 15.
- 118 3. Each cluster is defined by a number of core genes, which ranges uniformly  
119 from 1 to 100.
- 120 4. Each isolate has a probability between 80% to 99% of independently carrying  
121 each of the core genes of the cluster it belongs to.
- 122 5. Conversely, each isolate has a probability (PN) to independently carry each of  
123 the non-core genes of its cluster. Non-core genes are composed of core genes of  
124 other clusters and "noise" genes which are not defining characteristics of any  
125 cluster (in total 300 genes).

126

127 Each generated dataset has on average 300 isolates with a gene content of 1300  
128 genes present/absent on average. For each dataset, we estimated the genetic  
129 pairwise Hamming distance ( $d_H$ ) and the distance using the t-SNE algorithm ( $d_t$ ).  
130 The Hamming distance is simply the number of differences between two  
131 sequences of equal length, which in this case refers to a gene being present in  
132 one isolate but absent in the other. The implementation of the t-SNE algorithm  
133 that we use yields a coordinate in a 2D plane for each isolate, and we calculate  
134 the distance  $d_t$  simply as the Euclidean distance for each pair of isolates.

135

136 If a cluster is sufficiently differentiable in terms of its gene content, we expect the  
137 Hamming distance within the cluster to be smaller than to any other isolate not  
138 belonging to it. For the t-SNE algorithm to be considered valid, it should be able  
139 to project the isolates from the same cluster on the 2D plane sufficiently close  
140 together so that the Euclidean distance within the cluster is smaller than to any  
141 other isolate. Given the conditions that were used to generate the synthetic  
142 datasets, not all clusters are necessarily differentiable in terms of their gene  
143 content, therefore we classified the t-SNE algorithm as performing erroneously  
144 only when a pair of isolates belonging to different cluster are not identified as  
145 such by the algorithm but are correctly identified using the Hamming distance.  
146 For high levels of noise, i.e. a large value of PN, differentiating the clusters using  
147 their gene content becomes increasingly difficult as the isolates may lack a  
148 sufficiently stable signal of relatedness.

149

150 We analyzed the performance of the t-SNE algorithm for three levels of noise PN:

151 0.001, 0.005 and 0.01, which measures the average proportion of non-core genes  
152 in each isolate. We performed 100 repeats for each noise value, which for each  
153 repeat involves generating on average 300 sequences and comparing almost  
154 45000 pairs of isolates. The average error for the three noise values was 0.5%,  
155 1% and 4% respectively, with a small error representing a particular isolate mis-  
156 allocated (i.e. very close to a different cluster) and a large error representing two  
157 clusters which are not appropriately differentiated by the t-SNE algorithm,  
158 illustrated in Figure 1. The error of the t-SNE algorithm increases with the noise,  
159 as shown in Figure 1(iii), and with the total number of clusters (not shown).

160

161 **WEB APPLICATION - <https://panini.wgsa.net/>**

162 The t-SNE algorithm implemented in C++ ([https://github.com/lvdmaaten/](https://github.com/lvdmaaten/bhtsne)  
163 [bhtsne](https://github.com/lvdmaaten/bhtsne)) was wrapped as a Node.js native module and embedded within a web  
164 application. The application is written in JavaScript and utilises React  
165 (<https://facebook.github.io/react>) for front-end and the Vis.js library  
166 (<http://visjs.org>) for network visualisation.

167 1) Data are uploaded as a gene presence/absence matrix - Panini expects data in  
168 the .rtab format (the output from Roary: the pan genome pipeline [10];  
169 <https://sanger-pathogens.github.io/Roary>) However, this is simply a data file  
170 containing gene rows and isolate columns with '1' or '0' indicating  
171 presence/absence of a particular gene for a particular isolate.

172 2) Genes present in all isolates are ignored (i.e. core genome) and non-core  
173 genes are clustered using t-SNE with default parameters (auto perplexity and  
174 theta=0.5 – parameters can be changed by users).

175 3) The Results (x, y coordinates, a '.dot' format file containing graph layout, csv

176 and JSON) are made available for download and reuse. Results are also visualised  
177 directly within the PANINI web application as a graph layout.

178 To interpret the data in an epidemiological, phylogeographic and geographic  
179 context, the estimated network can also be uploaded directly to the Microreact  
180 platform allowing a user to add other forms of data to relate to the resulting  
181 neighbor embedding, typically a phylogenetic tree, geographical locations of the  
182 isolates, and temporal data (Further information and instructions at  
183 <https://microreact.org> ).

184

## 185 **UTILITY WITH EXISTING PUBLISHED DATASETS**

186

187 To demonstrate utility of t-SNE clustering we applied the method to three  
188 published datasets which used Whole Genome Sequencing (WGS) to study the  
189 evolution of the bacterium *Streptococcus pneumoniae*. The first, a population  
190 level dataset, detailed population-wide diversity of pneumococci within  
191 Massachusetts, USA pre- and post vaccine introduction [2], while the second and  
192 third detailed international collections of globally-disseminated multidrug-  
193 resistant lineages of *Streptococcus pneumoniae* [11, 12]. Additional biological  
194 insights made possible with PANINI are described, and links to the projects  
195 within Microreact for further exploration of associated metadata and download  
196 of raw data formats are provided.

197

198

199

200

201 **ANALYSIS OF A DIVERSE PNEUMOCOCCAL POPULATION**

202

203 **Data Visualisation and download:**

204 <https://microreact.org/project/panini-sparc?ui=nt>

205 **Source data and .RTab file:**

206 <https://gitlab.com/cgps/panini/datasets/tree/master/SPARC>

207 **Video walkthrough for PANINI and Microreact creation/use:**

208 <https://vimeo.com/230416235>

209

210 PANINI was applied to a collection of 616 systematically-sampled pneumococcal  
211 isolates from a vaccine and antimicrobial resistance surveillance project in  
212 Massachusetts [13]. The original analysis of gene content in this collection  
213 identified 5,442 ‘clusters of orthologous genes’ (COGs) [2], the core set of which  
214 was used to define fifteen ‘sequence clusters’ with BAPS  
215 (<http://www.helsinki.fi/bsg/software/BAPS>) [18]. For most of the sequence  
216 clusters, the correspondence between a group in the PANINI output and the  
217 original sequence clusters was exact (Figure 2A), reflecting their similarity both  
218 in terms of the core and accessory genomes [14]. These sets of isolates therefore  
219 represent well-defined, distinct lineages. However, SC1, SC6, SC10 and SC12 all  
220 exhibited distinct substructuring in the PANINI output. This corresponded well  
221 with the diverse core genome observed in these clusters (Figure 2B), and in each  
222 case, these groups were consistent with clades within the sequence clusters.  
223 These sequence clusters are therefore likely to represent amalgams of genotypes  
224 that should be subdivided into multiple clusters. Conversely, PANINI revealed  
225 clear substructuring within the previously unclustered SC16, which was also

226 consistent with the core genome phylogeny. Hence PANINI can easily facilitate  
227 the division of a diverse population into discrete genotypes that are coherent in  
228 their accessory and core genome content.

229

## 230 **EXTENSIVE PROPHAGE VARIATION IN A MULTIDRUG-RESISTANT LINEAGE**

231

### 232 **Data Visualisation and download:**

233 <https://microreact.org/project/panini-pmen2?ui=nt>

### 234 **Source data and .RTab file:**

235 <https://gitlab.com/cgps/panini/datasets/tree/master/PMEN2>

236

237 PANINI was applied to an analysis of orthologous genes across a global collection  
238 of 190 isolates from the multidrug-resistant *Streptococcus pneumoniae* clone  
239 PMEN2 [11], which caused a large outbreak of disease in Iceland starting in the  
240 late 1980s (Figure 3A). Multiple distinct clusters were again evident in the  
241 output (Figure 3B). In some cases, these were consistent with the phylogeny. The  
242 original analysis identified two independent entries of the lineage into Iceland,  
243 clades IC1 and IC2, the latter of which contained many fewer isolates and was  
244 clustered as IcA in the annotated output. By contrast, IC1 was distributed across  
245 four clusters IcB-E, which did not correspond with clear clades in the phylogeny.  
246 The difference between IcB and IcC is technical, rather than biological: all IcB  
247 isolates were sequenced early in the project with 54 nt reads, whereas most IcC  
248 isolates were sequenced with 75 nt reads. Unusually for pneumococci, the  
249 isolates in both these groups were trilysogenic, carrying prophage similar to  
250  $\phi$ 670-6B.1 and  $\phi$ 670-6B.2, found in the *S. pneumoniae* 670-6B genome inserted

251 between *dnaN* and *pth* (*att*<sub>670</sub>), and within the *comYC* gene (*att*<sub>comYC</sub>),  
252 respectively; and a prophage isolated from 0211+13275, inserted at  
253 SPN23F15280 - SPN23F15810 (*att*<sub>MM1</sub>) [15]. The apparent rapid acquisition, and  
254 stable maintenance, of multiple viral loci may relate to the abrogation of these  
255 bacteria's competence system by the insertion of prophage  $\phi$ IC1 into *comYC*  
256 [11,16]. Group IcD, interspersed with IcB and IcC within clade IC1 in the  
257 phylogeny, differs in the absence of prophage similar to  $\phi$ 670-6B.2. IcE, also  
258 polyphyletic within clade IC1, differed in having lost the region of PPI-1 that  
259 encodes the *pia* iron transport operon, which plays a role in pneumococcal  
260 pathogenesis in animal models [17]. Hence it is not surprising to find these  
261 isolates were only recovered from sputum, otitis media samples or  
262 nasopharyngeal swabs.

263

264 Multiple distinct clusters of non-Icelandic isolates were also observed. These all  
265 represented cases where t-SNE grouped isolates that were disparate in terms of  
266 their country and year of isolation, , as well as having a polyphyletic distribution  
267 across the whole genome phylogeny. These groupings represented cases of  
268 convergent evolution through parallel acquisition very similar prophage. Group  
269 IntA lacked any prophage similar to those shown in Figure 3C; group IntB had  
270 prophage with some similarity to both prophage in the reference genome; group  
271 IntC only had a prophage with similarity to  $\phi$ 0211+13275, whereas group IntD  
272 had prophage similar to  $\phi$ 0211+13275 and  $\phi$ 670-6B.1 as well. Hence the rapid  
273 movement of prophage sequences within lineages [14] clearly substantially  
274 contributes to the changes in gene content observed over short timescales.  
275 PANINI facilitates rapid analysis of these diverse elements, and their complex

276 relationship with bacterial population structure.

277

278 **MOBILE ELEMENT AND SEROTYPE VARIATION IN A VACCINE-ESCAPE**

279 **LINEAGE**

280

281 **Data Visualisation and download:**

282 <https://microreact.org/project/panini-pmen14?ui=nt>

283 **Source data and .RTab file:**

284 <https://gitlab.com/cgps/panini/datasets/tree/master/PMEN14>

285

286 PANINI was similarly applied to 176 isolates of the multidrug-resistant *S.*

287 *pneumoniae* PMEN14 lineage [11]. Although the sequences came from many

288 countries, the collection was strongly enriched for bacteria from the Maela

289 refugee camp in Thailand, which fell into five clades (ML1-5), of which ML2 was

290 the largest. The groups identified by PANINI were again polyphyletic (Figure 4A),

291 with ML2 split up in a similar manner to the PMEN2 clade IC1. This was again

292 driven by the distribution of prophage sequence: group 1 isolates were free of

293 prophage, whereas group 2 isolates were infected with a ‘group 2-type’

294 prophage, and group 3 isolates were infected with a similar, but distinct, ‘group

295 3-type’ prophage (Figure 4B). Clade ML2 isolates in group 4 were distinguished

296 by variation in another mobile genetic element, a phage-related chromosomal

297 island (PRCI), shared by most of the isolates. This PRCI was absent from these

298 assemblies, either because at least part of the element had been lost through

299 deletion, replacement with a related sequence (isolate 6259\_1-15), or the

300 acquisition of a second, highly similar PRCI that prevented effective assembly of

301 either (isolates 6237\_8-12, 6237\_8-13 and 6237\_8-18). In this latter case,  
302 mapping to the element was still evident.

303

304 A fifth group, which did not include any Maela isolates, corresponded to the  
305 antibiotic-susceptible outgroup isolates. These differed through the absence of a  
306 third type of mobile element, the Tn916 integrative and conjugative element, an  
307 antibiotic resistance-encoding genomic island that was absent from these  
308 'outgroup' isolates. Additionally, these bacteria shared two smaller genomic  
309 islands, encoding putative lantibiotic biosynthesis and restriction-modification  
310 operons, which were absent from the multidrug-resistant isolates. Variation in  
311 other non-mobile element islands was also detectable. The group 1-19A  
312 subcluster contained isolates of serotype 19A, produced through two  
313 independent serotype switching recombinations at the capsule polysaccharide  
314 synthesis (*cps*) locus that resulted in genotypes '19A ST320' and '19A ST236'.  
315 These changes were responsible for allowing isolates to evade the seven valent  
316 polysaccharide conjugate vaccine, which targeted the lineage's ancestral  
317 serotype 19F, expressed by almost all the rest of the collection [12]. A smaller  
318 serotype switching recombination, which did not replace the entire serotype-  
319 determining *cps* locus, generated the '19A ST271' isolates [12]. The smaller  
320 associated change in gene content meant this isolate was not clearly  
321 distinguished from the rest of group 1 (Figure 4A).

322

## 323 **DISCUSSION**

324 The rapid increase in sampling density of bacterial populations for  
325 epidemiological and evolutionary studies highlights the need of combining

326 traditional genomic markers, such as SNP loci and small insertions or deletions  
327 in coding regions, with measures of difference in terms of gene content. As many  
328 bacteria have varied accessory genomes, changes in the gene content can offer a  
329 way to identify epidemiologically or evolutionarily important clues about the  
330 evolutionary processes affecting a pathogen's spread. As we illustrated here,  
331 such information is most useful when clustering is combined within a  
332 phylogeographical approach, and visualized jointly in a seamless fashion  
333 enabling the rapid interpretation of core and non-core clustering in the context  
334 of where and when data were collected.

335

336 The t-SNE algorithm is a very efficient approach to cluster isolates based on their  
337 gene content. In the simulated scenarios considering synthetic data, the errors in  
338 clustering always remained small, either representing an isolate allocated to a  
339 wrong cluster, or two clusters which were not appropriately differentiated.  
340 However, this only occurred in simulations with the "noise" level much higher  
341 than expected in nature. In general, what we defined as "core" genes in a cluster  
342 rarely appear in isolates not belonging to the cluster, and if they do, it is typically  
343 at much lower frequencies than those we considered. Furthermore, in our  
344 synthetic datasets we formed clusters defined by as few as a single core gene.  
345 These clusters with a limited number of core genes, combined with relatively  
346 high levels of "noise", are in practice almost completely indistinguishable from  
347 others, as illustrated in Figure 1 (iii - clusters K, L, O and Q). Overall, our  
348 simulated datasets are conservative, as the gene absence and presence variation  
349 is higher than expected in natural populations, and therefore indicate that the t-  
350 SNE is a promising approach for rapidly and accurately clustering bacteria based

351 on gene content.

352

353 When applied to a population-wide genomic dataset, the algorithm was clearly  
354 able to identify distinct lineages within a diverse collection. This analysis could  
355 highlight which clusters, defined using the core genome, could be sensibly  
356 subdivided, and which small groups of within a diverse set of strains could be  
357 justifiably regarded as new clusters. Within lineages, the same congruence  
358 between core and accessory genomes across clades was not observed. Instead,  
359 clusters were distinguished by rapidly occurring, homoplastic alterations, such as  
360 phage infection. In this context, PANINI provides an intuitive way in which to  
361 understand the distribution of rapidly-evolving aspects of the genome, which are  
362 difficult to analyse in a conventional phylogenetic framework. PANINI is  
363 therefore a promising platform through which biologically-important changes in  
364 bacterial gene content can be uncovered at all levels of evolutionary, ecological  
365 and epidemiological analyses.

366

#### 367 **FUNDING**

368 The Development of PANINI was funded by The Centre for Genomic Pathogen  
369 Surveillance and Wellcome Trust Grant 099202. J.C. was supported by the ERC  
370 grant no. 742158. Z.Y. was supported by the COIN Centre of Excellence. J.M.P.  
371 gratefully acknowledge funding of the NTD Modelling Consortium by the Bill &  
372 Melinda Gates Foundation in partnership with the Task Force for Global Health.  
373 The views, opinions, assumptions, or any other information set out in this report  
374 should not be attributed to the Bill & Melinda Gates Foundation and the Task  
375 Force for Global Health or any person connected with them. NJC is funded by a

376 Sir Henry Dale Fellowship, jointly funded by the Wellcome Trust and Royal  
377 Society (Grant Number 104169/Z/14/Z).

378

379 **REFERENCES**

380 1. Harris SR, Feil EJ, Holden MT, Quail MA, Nickerson EK, Chantratita N, et al.  
381 Evolution of MRSA during hospital transmission and intercontinental spread.  
382 Science. 2010 Jan 22;327(5964):469-74

383 2. Croucher NJ, Finkelstein JA, Pelton SI, Mitchell PK, Lee GM, et al.  
384 Population genomics of post-vaccine changes in pneumococcal epidemiology.  
385 Nat Genet. 2013 Jun;45(6):656-63

386 3. Chewapreecha C, Harris SR, Croucher NJ, Turner C, Marttinen P, et al  
387 Dense genomic sampling identifies highways of pneumococcal recombination.  
388 Nat Genet. 2014 Mar;46(3):305-309

389 4. Aanensen DM, Feil EJ, Holden MT, Dordel J, Yeats CA, et al. Whole-Genome  
390 Sequencing for Routine Pathogen Surveillance in Public Health: a Population  
391 Snapshot of Invasive Staphylococcus aureus in Europe. MBio. 2016 May 5;7(3)

392 5. Argimón S, Abudahab K, Goater RJ, Fedosejev A, Bhai J, et al. Microreact:  
393 visualizing and sharing data for genomic epidemiology and phylogeography.  
394 Microb Genom. 2016 Nov 30;2(11):e000093

395 6. Marttinen P, Croucher NJ, Gutmann MU, Corander J, Hanage WP.  
396 Recombination produces coherent bacterial species clusters in both core and  
397 accessory genomes. Microb Genom. 2015 Nov 5;1(5)

398 7. McNally A, Oren Y, Kelly D, Pascoe B, Dunn S, et al. Combined Analysis of  
399 Variation in Core, Accessory and Regulatory Genome Regions Provides a Super-  
400 Resolution View into the Evolution of Bacterial Populations. PLoS Genet. 2016

- 401 Sep 12;12(9):e1006280.
- 402 8. van der Maaten L & Hinton G. Visualizing Data using t-SNE. JMLR 2008  
403 9(Nov):2579--2605.
- 404 9. van der Maaten L. Accelerating t-SNA using Tree-Based Algorithms. JMLR  
405 2014 15(Oct):3221-3245.
- 406 10. Page AJ, Cummins CA, Hunt M, Wong VK, Reuter S, et al. Roary: rapid  
407 large-scale prokaryote pan genome analysis. Bioinformatics. 2015 Nov  
408 15;31(22):3691-3
- 409 11. Croucher NJ, Hanage WP, Harris SR, McGee L, van der Linden M, de  
410 Lencastre H, et al. Variable recombination dynamics during the emergence,  
411 transmission and “disarming” of a multidrug-resistant pneumococcal clone. BMC  
412 Biol. 2014;12: 49.
- 413 12. Croucher NJ, Chewapreecha C, Hanage WP, Harris SR, McGee L, et al.  
414 Evidence for soft selective sweeps in the evolution of pneumococcal multidrug  
415 resistance and vaccine escape. Genome Biol Evol. 2014 Jun 10;6(7):1589-602.
- 416 13. Finkelstein JA, Huang SS, Daniel J, Rifas-Shiman SL, Kleinman K, et al.  
417 Antibiotic-resistant *Streptococcus pneumoniae* in the heptavalent pneumococcal  
418 conjugate vaccine era: predictors of carriage in a multicomunity sample.  
419 Pediatrics. 2003 Oct;112(4):862-9
- 420 14. Croucher NJ, Coupland PG, Stevenson AE, Callendrello A, Bentley SD,  
421 Hanage WP. Diversification of bacterial genome content through distinct  
422 mechanisms over different timescales. Nat Commun. Nature Publishing Group;  
423 2014;5: 5471.
- 424 15. Romero P, Croucher NJ, Hiller NL, Hu FZ, Ehrlich GD, Bentley SD, et al.  
425 Comparative genomic analysis of ten *Streptococcus pneumoniae* temperate

- 426 bacteriophages. J Bacteriol. 2009;191: 4854–4862.
- 427 16. Croucher NJ, Mostowy R, Wymant C, Turner P, Bentley SD, Fraser C.  
428 Horizontal DNA Transfer Mechanisms of Bacteria as Weapons of Intragenomic  
429 Conflict. PLOS Biol. 2016;14: e1002394.
- 430 17. Brown JS, Gilliland SM, Ruiz-Albert J, Holden DW. Characterization of pit, a  
431 Streptococcus pneumoniae iron uptake ABC transporter. Infect Immun. 2002;70:  
432 4389–4398. doi:10.1128/IAI.70.8.4389-4398.2002
- 433 18. Corander J, Marttinen P, Sirén J, Tang J. Enhanced Bayesian modelling in  
434 BAPS software for learning genetic structures of populations. BMC  
435 bioinformatics. 2008 Dec 16;9(1):539. doi: 10.1186/1471-2105-9-539

436

#### 437 **FIGURE LEGENDS**

438

439 **Figure 1** Illustration of a simulated dataset, with the isolates' gene content  
440 (left), black dots indicate presence of a gene, x-axis represent all the considered  
441 genes (total of 1213 genes in this simulation). The right panels show the  
442 embedded locations in the 2D plane as estimated by the t-SNE algorithm, with  
443 each colour representing a cluster in the underlying simulation model. Clusters  
444 are named using the alphabet (A, B, C...). From top to bottom, plots indicate  
445 simulations generated with 0.1% (i), 0.5% (ii) and 1%(iii) noise, respectively.

446

447 **Figure 2** A) Annotated output of the PANINI algorithm applied to 616 *S.*  
448 *pneumoniae* isolates from a diverse population in Massachusetts. Each node  
449 represents an isolate, each of which is coloured according to its sequence cluster,  
450 as defined using the core genome. Clusters of isolates belonging to the same

451 sequence cluster are circled and annotated. Where sequence clusters are divided  
452 into multiple groups in the PANINI network, the circles are joined by dashed  
453 lines. B) Core genome phylogeny based on comparison of conserved clusters of  
454 orthologous genes adapted from [2] and displayed within Microreact. Sequence  
455 clusters are annotated for comparison with non-core clustering.

456

457 **Figure 3** Analysis of the *S. pneumoniae* PMEN2 lineage. A) i) Core genome  
458 phylogeny with tree leaves coloured by country of origin and ii) geographic  
459 origin of isolates. B) Annotated output of the PANINI algorithm applied to 189  
460 isolates from an international collection of representatives of the *S. pneumoniae*  
461 PMEN2 lineage. Each point is coloured according to its region of origin. Groups  
462 defined by the structure of the PANINI output are circled and annotated. Clusters  
463 containing primarily Icelandic isolates (coloured orange) are labelled with 'Ic'  
464 prefixes, whereas those containing isolates from multiple countries are labelled  
465 with 'Int' prefixes. C) Variation in accessory loci associated with differential  
466 classification of isolates into groups. The orange and brown bands across the top  
467 of the figure indicate the extent of the three prophage and pneumococcal  
468 pathogenicity island 1 (PPI-1) sequences, against which the short read data from  
469 the isolates were mapped. The heatmap below includes one row per isolate,  
470 which were ordered according to their grouping in panel A. The heatmap is  
471 coloured blue where mapping coverage was low, indicating a locus is absent, and  
472 red where mapping coverage was high, indicating a sequence was present.  
473 Horizontal dashed lines indicate the boundaries between the groups of isolates,  
474 which vertical dashed lines indicate the boundaries between loci.

475

476 **Figure 4** Analysis of the *S. pneumoniae* PMEN14 lineage. A) Annotated output of  
477 the PANINI algorithm applied to 176 isolates from an international collection of  
478 representatives of the *S. pneumoniae* PMEN14 lineage. The main groups 1-5 are  
479 circled with solid lines and named; the subgroups within group 1 are circled by  
480 dashed lines. (B) Variation in accessory loci associated with differential  
481 classification of isolates into groups. This heatmap is displayed as in Figure 3. In  
482 this case, the sequence loci across the top are more functionally diverse. The first  
483 is the *neuB* coding sequence with an ISS<sub>pn8</sub> element inserted into it. The lack of  
484 mapping to the middle of this column indicates the absence of this insertion  
485 sequence anywhere in the chromosome. The next loci are alternative alleles of  
486 the capsule polysaccharide synthesis locus, one encoding for the biosynthesis of  
487 the 7-valent polysaccharide conjugate vaccine (PCV7) type 19F polysaccharide,  
488 the other for the non-PCV7 type 19A polysaccharide. These are followed by two  
489 similar prophage, one associated with group 2 isolates, the other with group 3  
490 isolates; the similarity between these two viruses means there is extensive  
491 mapping to both, even when an isolate only contains one of them. The PRCI  
492 absent from the assemblies of group 4 isolates is next; mapping suggests this is  
493 actually present in some, but PANINI nevertheless included them in this group  
494 because the acquisition of a further, related PRCI prevented either assembling  
495 accurately. This is followed by the Tn916 conjugative element, absent from the  
496 group 5 isolates, which possess genomic islands encoding for the biosynthesis of  
497 a lantibiotic and a restriction-modification system, included at the right-hand  
498 end of the panel.



**A**



**B**





**A**



**B**
